# Supplementary material
Source: PubMed Central journal article supplement (PMC3880142)
Supplement: NIHMS530760-supplement-1_si_001.pdf [file NIHMS530760-supplement-1_si_001.pdf]

## SUPPORTING INFORMATION

### Discovery of a cAMP Deaminase That Quenches Cyclic AMP-Dependent Regulation

Alissa M. Goble<sup>†#</sup>, Youjun Feng<sup>‡#</sup>, Frank M. Raushel<sup>†</sup> and John E. Cronan<sup>\*,‡,||</sup>

<sup>†</sup>Department of Chemistry, Texas A&M University, P.O. Box 30012, College Station, Texas 77843-3012, United States

<sup>‡</sup>Departments of Microbiology and <sup>||</sup>Biochemistry, University of Illinois, Urbana, IL 60801, United States

<sup>#</sup>, these authors contributed equally to this work

Table S1. Oligonucleotides used in this work

| Name                        | Oligonucleotides (5'-3') <sup>a</sup>                                  |
|-----------------------------|------------------------------------------------------------------------|
| LIC10459-N                  | AGAG <u>CATATGG</u> CTTTAACTTTTCAAGAGATTTTAGATAGAATTC                  |
| LIC10459-C                  | AGAGA <u>AAGCTTT</u> CTTAGACCGTATCTTGTTTTACGAG                         |
| LIC10791-N                  | AGAG <u>CCATGGT</u> GAAAGTAACCGAGTCCATGATTGAGAAATTAG                   |
| LIC10791-C                  | AGAGA <u>AAGCTTT</u> CAAACATCCACCGTATATTTAAAAAGAGAATCTCG<br>AAGGATTAAG |
| LIC10237-N                  | AGAG <u>CCATGGT</u> GTCCACAGGGATCTTCCAAATCGTTAATTTC                    |
| LIC10237-C                  | AGAGA <u>AAGCTTT</u> TATACTCTTTTTTTGAGTTTGTTTTCCATCTGAGATT<br>TTTTTC   |
| LIC10268-N                  | AGAG <u>CCATGGT</u> GGATATGATGCTCGAATCCATGTTTTCTAAATTCGG               |
| LIC10268-C                  | AGAGA <u>AAGCTTT</u> TAAAGAATTCGGTTTCCGTTTTTGTCGACGATTCTC<br>TG        |
| LIC11484-N                  | AGAG <u>CCATGG</u> GGGAGATTA AAAACGAAATTCAGATTGTTATCTTT<br>GTCC        |
| LIC11484-C                  | AGAGA <u>AAGCTTT</u> TAGTGATTTAAGCCTGAAATTCCTTCAAAGCGTCT<br>ACG        |
| <i>fadD</i> -CRP-<br>site-F | GTAAAGATAAAAATAAATAGTGAC <b>â</b> GCGCTTCGCAACCTTTTCGTT<br>GGG         |
| <i>fadD</i> -CRP-<br>site-R | CCCAACGAAAAGGTTGCGAAGCGCGTCACTATTTATTTTATCTTT<br>AC                    |

<sup>a</sup>All but the last two oligonucleotides were used as PCR primers with -N and -C indicating primers corresponding to the sequences encoding the N- and C-termini of the proteins, respectively. Introduced restriction site are underlined. The last two oligonucleotides were mixed and annealed to give the double-stranded *fadD* CRP binding site (in bold type).

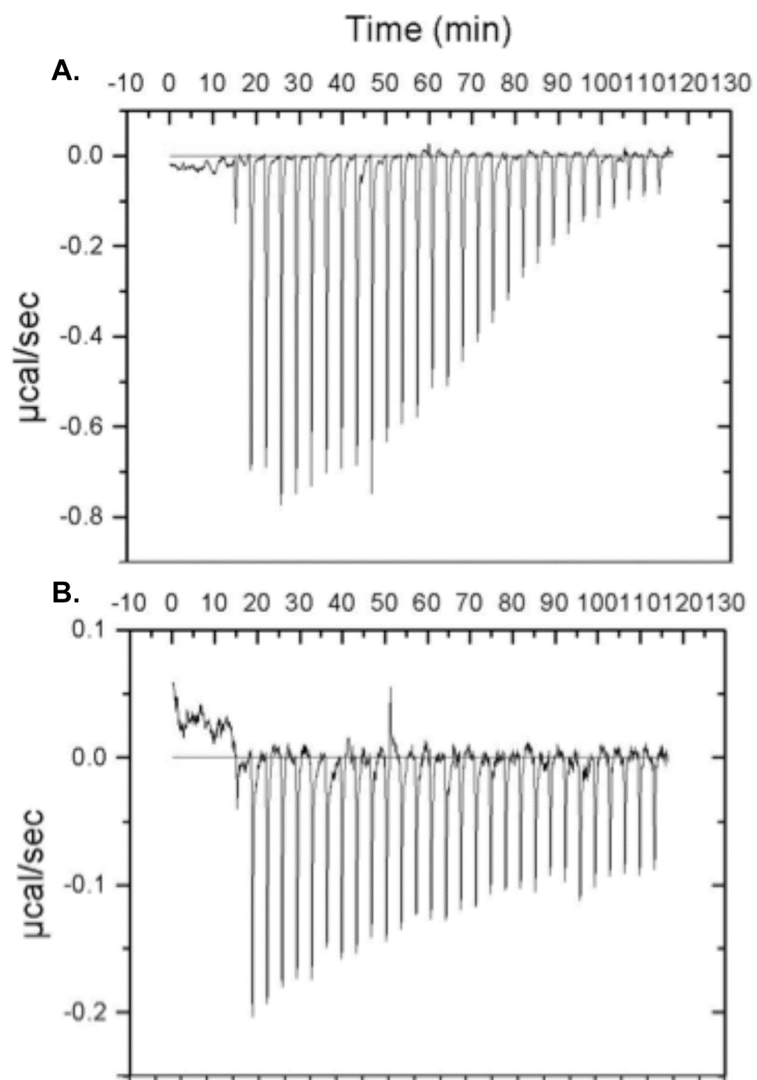

Figure S2. Isothermal titration calorimetry raw data. A) The protein encoded by LIC10791 titrated with cAMP or B) titrated with cIMP.
